# Supplementary material
Source: PubMed Central journal article supplement (PMC4286053)
Supplement: rspb20142254supp4.pdf [file rspb20142254supp4.pdf]

## Appendix S3

### Relationship between temperature and time to first attack

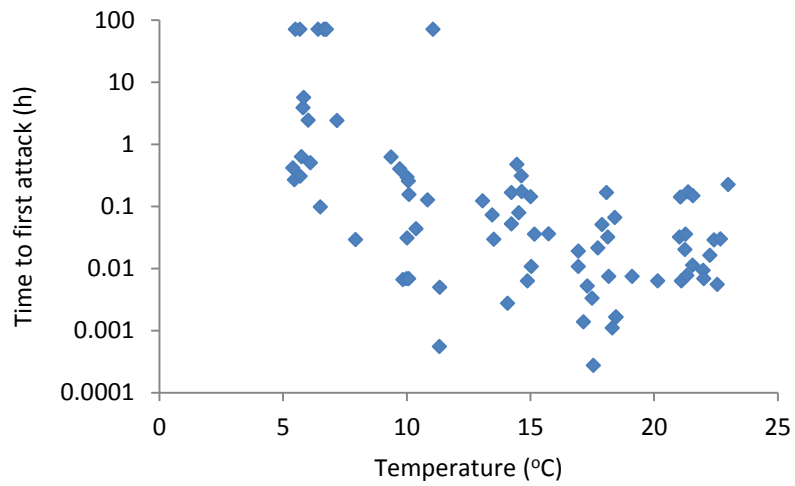

Figure S3. Temperature scaling of time to first attack by northern pike when feeding on brown trout. An attack was defined as the pike orienting and moving towards the prey.
